# Supplementary material for: 3D printing of monolithic gravity-assisted step-emulsification device for scalable production of high viscosity emulsion droplets
Source: Royal Society of Chemistry journal article supplement (doi:10.1039/d4lc00650j), 2024-01-01
Supplement: d4lc00650j1.pdf [file d4lc00650j1.pdf]

## Electronic Supplementary Information

### 3D Printing of Monolithic Gravity-Assisted Step-Emulsification Device for Scalable Production of High Viscosity Emulsion Droplets

Yoon-Ho Hwang<sup>a</sup>, Je Hyun Lee<sup>b</sup>, Taewoong Um<sup>c</sup>, and Hyomin Lee<sup>\*b</sup>

*a. Department of Polymer Engineering, Pukyong National University, Nam-gu, Busan 48513, Republic of Korea.*

*b. Department of Chemical Engineering, Pohang University of Science and Technology (POSTECH), Pohang, South Korea.*

*c. Mechatronics R&D Center, Samsung Electronics, Hwaseong, Gyeonggi-do 18448, South Korea*

#### Keywords

Step-emulsification; 3D-printing; Emulsions; Microfluidics; Microparticle; Parallelization

Corresponding Author

\* Tel.: +82-54-279-2336. E-mail: [hyomin@postech.ac.kr](mailto:hyomin@postech.ac.kr)

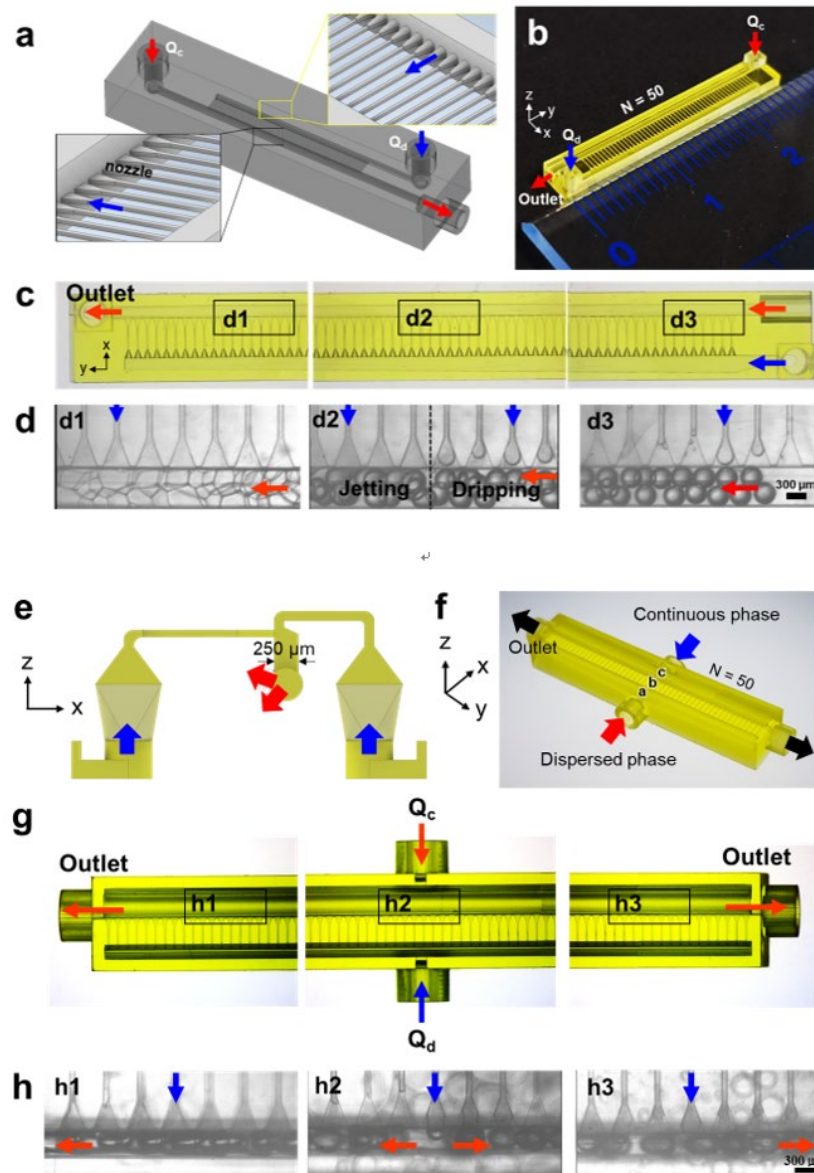

**Fig. S1.** (a) Schematics illustrating the 3D-printed step-emulsification device with one horizontal outlet. (b) Photograph and the (c) magnified photograph of the device. (d) Optical micrograph showing the droplet formation behavior at different drop generator nozzles (d1-d3). (e) Schematics illustrating the 3D-printed step-emulsification device with two horizontal outlets. (f) Photograph and the (g) magnified photograph of the device. (h) Optical micrograph showing the droplet formation behavior at different drop generator nozzles (h1-h3). The continuous phase is 2 wt% Span80 in mineral oil and the dispersed phase is DI water.

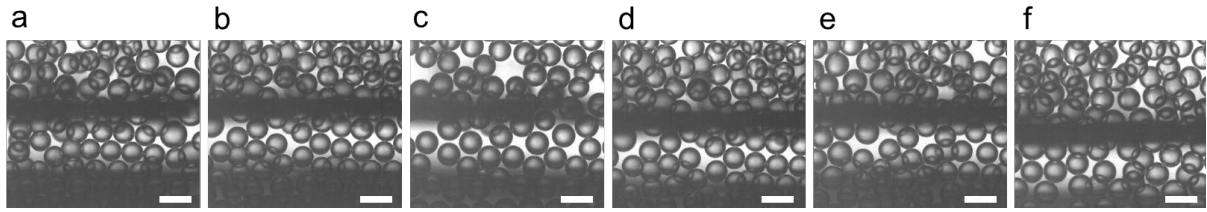

**Fig. S2.** Series of micrographs showing the monodisperse W/O emulsion droplets produced from the 3D-PSD at different flow rates. The average diameter of the droplets ( $d$ ) are (a) 193.5  $\mu\text{m}$  (CV = 3.2%), (b) 195.4  $\mu\text{m}$  (CV = 2.1%), (c) 198.4  $\mu\text{m}$  (CV = 2.6%), (d) 194.1  $\mu\text{m}$  (CV = 3.2%), (e) 195.8  $\mu\text{m}$  (CV = 2.5%), and (f) 193.4  $\mu\text{m}$  (CV = 2.9%), which are operated at ( $Q_d = 5 \text{ mL h}^{-1}$ ,  $Q_c = 50 \text{ mL h}^{-1}$ ), ( $Q_d = 10 \text{ mL h}^{-1}$ ,  $Q_c = 50 \text{ mL h}^{-1}$ ), ( $Q_d = 20 \text{ mL h}^{-1}$ ,  $Q_c = 50 \text{ mL h}^{-1}$ ), ( $Q_d = 30 \text{ mL h}^{-1}$ ,  $Q_c = 50 \text{ mL h}^{-1}$ ), ( $Q_d = 40 \text{ mL h}^{-1}$ ,  $Q_c = 50 \text{ mL h}^{-1}$ ), and ( $Q_d = 50 \text{ mL h}^{-1}$ ,  $Q_c = 50 \text{ mL h}^{-1}$ ), respectively. Scale bar presents 300  $\mu\text{m}$ .

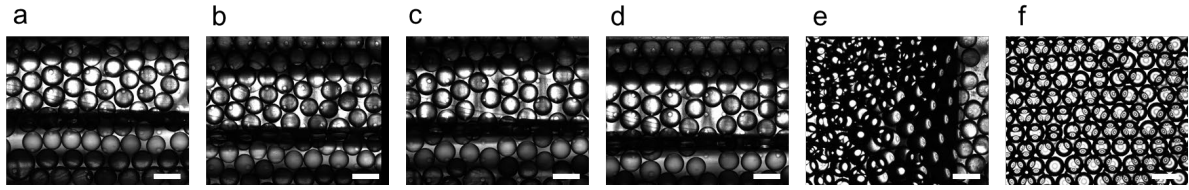

**Fig. S3.** Series of micrographs showing the monodisperse O/W emulsion droplets produced from the hydrophilically modified 3D-PSD at different flow rates. The average diameter of the droplets ( $d$ ) are (a) 193.5  $\mu\text{m}$  (CV = 3.2%), (b) 195.4  $\mu\text{m}$  (CV = 2.1%), (c) 198.4  $\mu\text{m}$  (CV = 2.6%), (d) 194.1  $\mu\text{m}$  (CV = 3.2%), (e) 195.8  $\mu\text{m}$  (CV = 2.5%), and (f) 193.4  $\mu\text{m}$  (CV = 2.9%), which are operated at ( $Q_d = 5 \text{ mL h}^{-1}$ ,  $Q_c = 50 \text{ mL h}^{-1}$ ), ( $Q_d = 10 \text{ mL h}^{-1}$ ,  $Q_c = 50 \text{ mL h}^{-1}$ ), ( $Q_d = 20 \text{ mL h}^{-1}$ ,  $Q_c = 50 \text{ mL h}^{-1}$ ), ( $Q_d = 30 \text{ mL h}^{-1}$ ,  $Q_c = 50 \text{ mL h}^{-1}$ ), ( $Q_d = 40 \text{ mL h}^{-1}$ ,  $Q_c = 50 \text{ mL h}^{-1}$ ), and ( $Q_d = 50 \text{ mL h}^{-1}$ ,  $Q_c = 50 \text{ mL h}^{-1}$ ), respectively. The continuous phase is 2 wt% PVA aqueous solution and the dispersed phase is DCM. Scale bar presents 300  $\mu\text{m}$ .

**Table S1.** Physical properties and parameters used for the CFD simulation.

| Notation      | Description                                                                   | Value                       |
|---------------|-------------------------------------------------------------------------------|-----------------------------|
| $\rho_c$      | Density of the continuous phase                                               | 770 kg/m <sup>3</sup>       |
| $\rho_d$      | Density of the dispersed phase                                                | 998 kg/m <sup>3</sup>       |
| $\mu_c$       | Dynamic viscosity of the continuous phase                                     | 3.0 x 10 <sup>-3</sup> Pa·s |
| $\mu_d$       | Dynamic viscosity of the dispersed phase                                      | 8.9 x 10 <sup>-4</sup> Pa·s |
| $^a\sigma$    | Interfacial tension between the continuous and dispersed phases               | 0.0050 N/m                  |
| $g$           | Gravitational acceleration                                                    | 9.8 m/s <sup>2</sup>        |
| $\theta_{dc}$ | Contact angle between the continuous and dispersed phases on the channel wall | 150°                        |
